# Supplementary material for: Application of the flipped classroom model based on Bloom’s Taxonomy of Educational Objectives in endodontics education for undergraduate dental students
Source: PeerJ. 2025 Jan 29;13:e18843. doi: 10.7717/peerj.18843 (PMC11786706; doi:10.7717/peerj.18843)
Supplement: Supplemental Information 1 [file peerj-13-18843-s001.xlsx]

## Sheet: Sheet1
	1			2			3			4			5			6
	Mode 1	Mode 2		Mode 1	Mode 2		Mode 1	Mode 2		Mode 1	Mode 2		Mode 1	Mode 2		Mode 1	Mode 2
	7	8		7	8		7	8		7	9		7	8		6	8
	7	8		6	8		6	8		6	8		6	8		6	8
	6	7		6	7		6	7		6	7		6	7		7	7
	7	9		7	8		7	7		7	8		7	8		6	8
	7	8		7	8		7	8		7	7		6	7		7	7
	8	8		8	8		8	8		6	8		8	8		8	8
	8	8		8	8		8	8		8	8		8	8		8	8
	7	7		7	7		7	7		7	7		7	7		7	7
	7	9		8	9		8	8		8	9		7	8		8	8
	7	9		7	8		7	8		7	8		7	8		7	8
	8	8		8	8		7	8		8	8		8	8		5	8
	6	7		6	7		6	7		6	7		6	7		6	7
	5	7		6	7		6	9		6	7		7	7		6	7
	7	7		7	8		6	8		7	8		7	8		8	8
	8	8		7	8		7	8		7	8		7	7		7	7
	8	8		8	8		8	8		6	7		8	8		8	8
	Table of analyses	data1		Table of analyses	data2		Table of analyses	data3		Table of analyses	data4		Table of analyses	data5		Table of analyses	data6		Table of analyses	data6
	line B	Mode 2		line B	Mode 2		line B	Mode 2		line B	Mode 2		line B	Mode 2		line B	Mode 2		line B	Mode 2
	vs	vs		vs	vs		vs	vs		vs	vs		vs	vs		vs	vs		vs	vs
	line A	Mode 1		line A	Mode 1		line A	Mode 1		line A	Mode 1		line A	Mode 1		line A	Mode 1		line A	Mode 1
	Unpaired t-test			Unpaired t-test			Unpaired t-test			Unpaired t-test			Unpaired t-test			Unpaired t-test			Unpaired t-test with Welch correction
	P value	0.0067		P value	0.0034		P value	0.0008		P value	0.0009		P value	0.0083		P value	0.0094		P value	0.0108
	Summary of P-values	**		Summary of P-values	**		Summary of P-values	***		Summary of P-values	***		Summary of P-values	**		Summary of P-values	**		Summary of P-values	*
	differ significantly (P < 0.05)?	yes		differ significantly (P < 0.05)?	yes		differ significantly (P < 0.05)?	yes		differ significantly (P < 0.05)?	yes		differ significantly (P < 0.05)?	yes		differ significantly (P < 0.05)?	yes		differ significantly (P < 0.05)?	yes
	One or two-tailed P value?	two-tailed		One or two-tailed P value?	two-tailed		One or two-tailed P value?	two-tailed		One or two-tailed P value?	two-tailed		One or two-tailed P value?	two-tailed		One or two-tailed P value?	two-tailed		One or two-tailed P value?	two-tailed
	t, df	t=2.912, df=30		t, df	t=3.177, df=30		t, df	t=3.707, df=30		t, df	t=3.696, df=30		t, df	t=2.825, df=30		t, df	t=2.777, df=30		Welch correction, t, df	t=2.777, df=22.62
	What's the difference?			What's the difference?			What's the difference?			What's the difference?			What's the difference?			What's the difference?			What's the difference?
	average value lineA	7.063		average valuelineA	7.063		average valuelineA	6.938		average valuelineA	6.813		average valuelineA	7		average valuelineA	6.875		average valuelineA	6.875
	average valuelineB	7.875		average valuelineB	7.813		average valuelineB	7.813		average valuelineB	7.75		average valuelineB	7.625		average valuelineB	7.625		average valuelineB	7.625
	average value difference (B - A) ± standard error	0.8125 ± 0.2790		average value difference (B - A) ± standard error	0.7500 ± 0.2361		average value difference (B - A) ± standard error	0.8750 ± 0.2361		average value difference (B - A) ± standard error	0.9375 ± 0.2536		average value difference (B - A) ± standard error	0.6250 ± 0.2213		average value difference (B - A) ± standard error	0.7500 ± 0.2700		average value difference (B - A) ± standard error	0.7500 ± 0.2700
	95% confidence interval	0.2426 to 1.382		95% confidence interval	0.2679 to 1.232		95% confidence interval	0.3929 to 1.357		95% confidence interval	0.4195 to 1.455		95% confidence interval	0.1731 to 1.077		95% confidence interval	0.1985 to 1.301		95% confidence interval	0.1909 to 1.309
	R-squared (eta-squared)	0.2203		R-squared (eta-squared)	0.2517		R-squared (eta-squared)	0.3141		R-squared (eta-squared)	0.3129		R-squared (eta-squared)	0.2101		R-squared (eta-squared)	0.2045		R-squared (eta-squared)	0.2543
	F-test for comparing variances			F-test for comparing variances			F-test for comparing variances			F-test for comparing variances			F-test for comparing variances			F-test for comparing variances			F-test for comparing variances
	F, DFn, Dfd	1.411, 15, 15		F, DFn, Dfd	2.014, 15, 15		F, DFn, Dfd	2.014, 15, 15		F, DFn, Dfd	1.205, 15, 15		F, DFn, Dfd	2.133, 15, 15		F, DFn, Dfd	3.667, 15, 15		F, DFn, Dfd	3.667, 15, 15
	P value	0.5128		P value	0.1867		P value	0.1867		P value	0.7222		P value	0.1537		P value	0.0166		P value	0.0166
	Summary of P-values	ns		Summary of P-values	ns		Summary of P-values	ns		Summary of P-values	ns		Summary of P-values	ns		Summary of P-values	*		Summary of P-values	*
	differ significantly (P < 0.05)?	no		differ significantly (P < 0.05)?	no		differ significantly (P < 0.05)?	no		differ significantly (P < 0.05)?	no		differ significantly (P < 0.05)?	no		differ significantly (P < 0.05)?	yes		differ significantly (P < 0.05)?	yes
	Data analysed			Data analysed			Data analysed			Data analysed			Data analysed			Data analysed			Data analysed
	sample size, lineA			sample size, lineA			sample size, lineA			sample size, lineA			sample size, lineA			sample size, lineA			sample size, lineA
	0.853913	0.718795		0.771902	0.543906		0.771902	0.543906		0.75	0.68313		0.730297	0.5		0.957427	0.5
	7			8			9			10			11			12
	Mode 1	Mode 2		Mode 1	Mode 2		Mode 1	Mode 2		Mode 1	Mode 2		Mode 1	Mode 2		Mode 1	Mode 2
	7	8		5	4		3	4		3	4		3	4		4	4
	7	8		3	5		3	4		3	4		4	4		3	4
	6	9		4	4		4	5		4	5		4	5		4	5
	7	9		4	4		4	4		3	4		3	4		4	4
	7	8		3	4		3	5		3	5		3	5		3	4
	8	8		4	4		4	4		4	4		4	4		4	4
	8	8		3	4		3	4		4	4		3	4		3	4
	7	7		3	3		4	3		4	3		4	5		4	4
	7	9		3	4		3	4		3	4		3	4		4	4
	7	9		4	5		4	4		4	4		4	3		4	4
	8	8		3	4		3	4		4	4		3	4		3	4
	6	7		4	3		4	3		4	5		4	5		4	4
	5	9		4	4		3	4		3	4		3	4		3	4
	7	7		4	4		4	4		4	4		4	4		3	4
	8	8		3	3		3	3		3	3		4	3		3	3
	7	9		3	4		4	4		4	4		3	4		4	4
	Table of analyses	data7		Table of analyses	data8		Table of analyses	data9		Table of analyses	data10		Table of analyses	data11		Table of analyses	data12
	line B	Mode 2		line B	Mode 2		line B	Mode 2		line B	Mode 2		line B	Mode 2		line B	Mode 2
	vs	vs		vs	vs		vs	vs		vs	vs		vs	vs		vs	vs
	line A	Mode 1		line A	Mode 1		line A	Mode 1		line A	Mode 1		line A	Mode 1		line A	Mode 1
	Unpaired t-test			Unpaired t-test			Unpaired t-test			Unpaired t-test			Unpaired t-test			Unpaired t-test
	P value	0.0002		P value	0.0883		P value	0.0308		P value	0.0143		P value	0.0042		P value	0.0093
	Summary of P-values	***		Summary of P-values	ns		Summary of P-values	*		Summary of P-values	*		Summary of P-values	**		Summary of P-values	**
	differ significantly (P < 0.05)?	yes		differ significantly (P < 0.05)?	no		differ significantly (P < 0.05)?	yes		differ significantly (P < 0.05)?	yes		differ significantly (P < 0.05)?	yes		differ significantly (P < 0.05)?	yes
	One or two-tailed P value?	two-tailed		One or two-tailed P value?	two-tailed		One or two-tailed P value?	two-tailed		One or two-tailed P value?	two-tailed		One or two-tailed P value?	two-tailed		One or two-tailed P value?	two-tailed
	t, df	t=4.284, df=30		t, df	t=1.762, df=30		t, df	t=2.267, df=30		t, df	t=2.600, df=30		t, df	t=3.101, df=30		t, df	t=2.782, df=30
	What's the difference?			What's the difference?			What's the difference?			What's the difference?			What's the difference?			What's the difference?
	average valuelineA	7		average valuelineA	3.563		average valuelineA	3.5		average valuelineA	3.563		average valuelineA	3.5		average valuelineA	3.563
	average valuelineB	8.188		average valuelineB	3.938		average valuelineB	3.938		average valuelineB	4.063		average valuelineB	4.125		average valuelineB	4
	average value difference (B - A) ± standard error	1.188 ± 0.2772		average value difference (B - A) ± standard error	0.3750 ± 0.2129		average value difference (B - A) ± standard error	0.4375 ± 0.1930		average value difference (B - A) ± standard error	0.5000 ± 0.1923		average value difference (B - A) ± standard error	0.6250 ± 0.2016		average value difference (B - A) ± standard error	0.4375 ± 0.1573
	95% confidence interval	0.6214 to 1.754		95% confidence interval	-0.05973 to 0.8097		95% confidence interval	0.04339 to 0.8316		95% confidence interval	0.1073 to 0.8927		95% confidence interval	0.2134 to 1.037		95% confidence interval	0.1163 to 0.7587
	R-squared (eta-squared)	0.3796		R-squared (eta-squared)	0.09375		R-squared (eta-squared)	0.1463		R-squared (eta-squared)	0.1839		R-squared (eta-squared)	0.2427		R-squared (eta-squared)	0.205
	F-test for comparing variances			F-test for comparing variances			F-test for comparing variances			F-test for comparing variances			F-test for comparing variances			F-test for comparing variances
	F, DFn, Dfd	1.185, 15, 15		F, DFn, Dfd	1.203, 15, 15		F, DFn, Dfd	1.234, 15, 15		F, DFn, Dfd	1.254, 15, 15		F, DFn, Dfd	1.438, 15, 15		F, DFn, Dfd	1.969, 15, 15
	P value	0.7464		P value	0.7256		P value	0.6887		P value	0.6668		P value	0.4906		P value	0.2011
	Summary of P-values	ns		Summary of P-values	ns		Summary of P-values	ns		Summary of P-values	ns		Summary of P-values	ns		Summary of P-values	ns
	differ significantly (P < 0.05)?	no		differ significantly (P < 0.05)?	no		differ significantly (P < 0.05)?	no		differ significantly (P < 0.05)?	no		differ significantly (P < 0.05)?	no		differ significantly (P < 0.05)?	no
	Data analysed			Data analysed			Data analysed			Data analysed			Data analysed			Data analysed
	sample size, lineA			sample size, lineA			sample size, lineA			sample size, lineA			sample size, lineA			sample size, lineA
	0.816497	0.75		0.629153	0.57373		0.516398	0.57373		0.512348	0.57373		0.516398	0.619139		0.512348	0.365148
	13			14			15			16			17
	Mode 1	Mode 2		Mode 1	Mode 2		Mode 1	Mode 2		Mode 1	Mode 2		Mode 1	Mode 2
	5	4		4	4		3	4		40	50		80	60
	3	5		3	5		3	4		45	45		120	80
	4	4		4	4		4	5		35	45		60	60
	4	5		4	4		4	4		50	45		60	45
	3	4		3	3		3	3		30	40		150	30
	4	4		4	5		4	4		25	50		45	60
	3	4		3	4		3	4		30	60		60	30
	4	3		4	3		4	5		40	45		90	30
	3	4		3	4		3	4		45	50		45	45
	4	5		4	5		4	5		25	55		60	45
	3	4		3	4		3	4		30	40		90	60
	4	4		4	4		4	4		30	35		90	60
	4	4		4	4		4	4		25	30		100	45
	4	4		4	4		4	4		15	30		120	60
	3	3		3	3		3	3		25	35		60	45
	4	4		4	4		3	3		30	30		120	45
	Table of analyses	data13		Table of analyses	data14		Table of analyses	data15		Table of analyses	data16		Table of analyses	data17		Table of analyses	data17
	line B	Mode 2		line B	Mode 2		line B	Mode 2		line B	Mode 2		line B	Mode 2		line B	Mode 2
	vs	vs		vs	vs		vs	vs		vs	vs		vs	vs		vs	vs
	line A	Mode 1		line A	Mode 1		line A	Mode 1		line A	Mode 1		line A	Mode 1		line A	Mode 1
	Unpaired t-test			Unpaired t-test			Unpaired t-test			Unpaired t-test			Unpaired t-test			Unpaired t-test with Welch correction
	P value	0.0813		P value	0.0726		P value	0.0204		P value	0.0035		P value	0.0003		P value	0.0006
	Summary of P-values	ns		Summary of P-values	ns		Summary of P-values	*		Summary of P-values	**		Summary of P-values	***		Summary of P-values	***
	differ significantly (P < 0.05)?	no		differ significantly (P < 0.05)?	no		differ significantly (P < 0.05)?	yes		differ significantly (P < 0.05)?	yes		differ significantly (P < 0.05)?	yes		differ significantly (P < 0.05)?	yes
	One or two-tailed P value?	two-tailed		One or two-tailed P value?	two-tailed		One or two-tailed P value?	two-tailed		One or two-tailed P value?	two-tailed		One or two-tailed P value?	two-tailed		One or two-tailed P value?	two-tailed
	t, df	t=1.804, df=30		t, df	t=1.861, df=30		t, df	t=2.449, df=30		t, df	t=3.165, df=30		t, df	t=4.038, df=30		Welch correction, t, df	t=4.038, df=20.66
	What's the difference?			What's the difference?			What's the difference?			What's the difference?			What's the difference?			What's the difference?
	average valuelineA	3.688		average valuelineA	3.625		average valuelineA	3.5		average valuelineA	32.5		average valuelineA	84.38		average valuelineA	84.38
	average valuelineB	4.063		average valuelineB	4		average valuelineB	4		average valuelineB	42.81		average valuelineB	50		average valuelineB	50
	average value difference (B - A) ± standard error	0.3750 ± 0.2079		average value difference (B - A) ± standard error	0.3750 ± 0.2016		average value difference (B - A) ± standard error	0.5000 ± 0.2041		average value difference (B - A) ± standard error	10.31 ± 3.259		average value difference (B - A) ± standard error	-34.38 ± 8.513		average value difference (B - A) ± standard error	-34.38 ± 8.513
	95% confidence interval	-0.04962 to 0.7996		95% confidence interval	-0.03663 to 0.7866		95% confidence interval	0.08312 to 0.9169		95% confidence interval	3.658 to 16.97		95% confidence interval	-51.76 to -16.99		95% confidence interval	-52.10 to -16.65
	R-squared (eta-squared)	0.09783		R-squared (eta-squared)	0.1034		R-squared (eta-squared)	0.1667		R-squared (eta-squared)	0.2503		R-squared (eta-squared)	0.3521		R-squared (eta-squared)	0.4411
	F-test for comparing variances			F-test for comparing variances			F-test for comparing variances			F-test for comparing variances			F-test for comparing variances			F-test for comparing variances
	F, DFn, Dfd	1.101, 15, 15		F, DFn, Dfd	1.600, 15, 15		F, DFn, Dfd	1.500, 15, 15		F, DFn, Dfd	1.041, 15, 15		F, DFn, Dfd	5.103, 15, 15		F, DFn, Dfd	5.103, 15, 15
	P value	0.8543		P value	0.3729		P value	0.4415		P value	0.9386		P value	0.0031		P value	0.0031
	Summary of P-values	ns		Summary of P-values	ns		Summary of P-values	ns		Summary of P-values	ns		Summary of P-values	**		Summary of P-values	**
	differ significantly (P < 0.05)?	no		differ significantly (P < 0.05)?	no		differ significantly (P < 0.05)?	no		differ significantly (P < 0.05)?	no		differ significantly (P < 0.05)?	yes		differ significantly (P < 0.05)?	yes
	Data analysed			Data analysed			Data analysed			Data analysed			Data analysed			Data analysed
	sample size, lineA			sample size, lineA			sample size, lineA			sample size, lineA			sample size, lineA			sample size, lineA
	0.60208	0.57373		0.5	0.632456		0.516398	0.632456		9.30949	9.123		31.1381	13.784
